# Supplementary material for: Occurrence of hyperoxia during iNO treatment for persistent pulmonary hypertension of the newborn: a cohort study
Source: Springer Nature journal article supplement (doi:10.1007/s00431-024-05506-6), 2024-03-12
Supplement: MOESM1 [file 26846604]

**Article title:** Occurrence of hyperoxia during iNO treatment for persistent pulmonary hypertension of the newborn

**Journal:** European Journal of Pediatrics

**Author names:** Justine de Jager<sup>\*1</sup>, Fleur Brouwer<sup>1</sup>, Jeroen Reijman<sup>1</sup>, Roel L. F. van der Palen<sup>2</sup>, Sylke J. Steggerda<sup>1</sup>, Remco Visser<sup>1</sup>, Arjan B. Te Pas<sup>1</sup>, Janneke Dekker<sup>1</sup>

1. Division of Neonatology, Department of Pediatrics, Leiden University Medical Center, Leiden, The Netherlands.
2. Division of Pediatric Cardiology, Department of Pediatrics, Leiden University Medical Center, Leiden, The Netherlands.

**\*Corresponding author:** Ms. Justine de Jager

Email: [j.de\\_jager@lumc.nl](mailto:j.de_jager@lumc.nl)

| <b>Pathology</b>                   | <b>Definition</b>                                                                                                                                                                                                                                                                                                                                                                           |
|------------------------------------|---------------------------------------------------------------------------------------------------------------------------------------------------------------------------------------------------------------------------------------------------------------------------------------------------------------------------------------------------------------------------------------------|
| Perinatal asphyxia                 | Oxygen deprivation during a period >10 minutes<br><br>AND <u>at least one</u> of the following criteria: <ol style="list-style-type: none"> <li>1. Apgar score at 5 minutes &lt;5</li> <li>2. Resuscitation</li> <li>3. Ventilation (after resuscitation) &gt;10 minutes after birth</li> <li>4. pH &lt;7.0*</li> <li>5. BE &lt;-16 mmol/L*</li> <li>6. Lactate &gt;10.0 mmol/L*</li> </ol> |
| Meconium aspiration syndrome (MAS) | Triad of MAS: <ol style="list-style-type: none"> <li>1. Meconium-stained amniotic fluid (MSAF)</li> <li>2. Respiratory distress</li> <li>3. Confirmed by chest X-ray</li> </ol>                                                                                                                                                                                                             |
| Infection                          | Antibiotic treatment for $\geq 7$ days                                                                                                                                                                                                                                                                                                                                                      |
| Combination                        | <u>At least two</u> of the following pathologies as defined above: <ol style="list-style-type: none"> <li>1. Perinatal asphyxia</li> <li>2. MAS</li> <li>3. Infection</li> </ol>                                                                                                                                                                                                            |
| Idiopathic                         | No identifiable cause                                                                                                                                                                                                                                                                                                                                                                       |
| Other                              | All pathologies that could not be placed in the categories above                                                                                                                                                                                                                                                                                                                            |

---

*\*Blood from umbilical cord **or** arterial, venous or capillary blood <1 hour after birth*
